# Supplementary material for: Acute Multiple Organ Failure in Adult Mice Deleted for the Developmental Regulator Wt1
Source: PLOS journal article supplement (doi:10.1371/journal.pgen.1002404), 2011-12-22

Figure S5

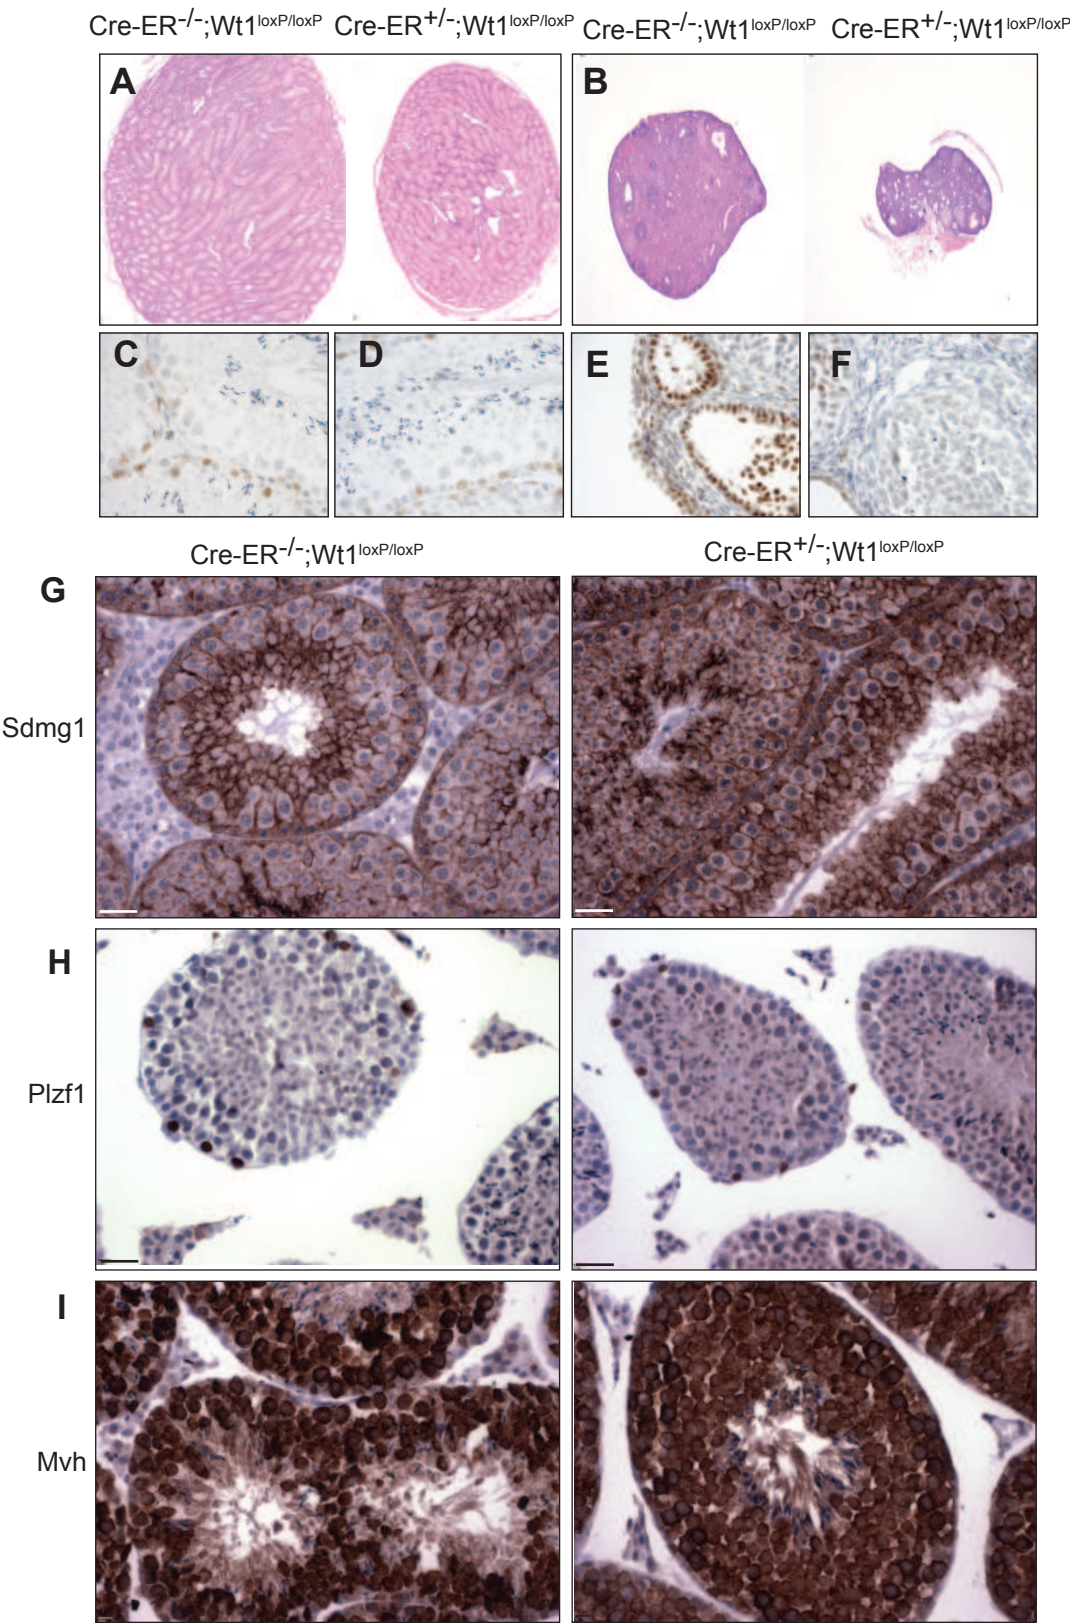

Supplement: S5 (10.1371/journal.pgen.1002404.s005) [file journal.pgen.1002404.s005]
